# Supplementary material
Source: publisher figshare collection journal article supplement (https://acs.figshare.com/ndownloader/files/25784214)
Supplement: Supplementary file 1 [file 25784214]

1 **Supporting Information**  
2 **Hygroscopic Growth and Phase Transitions of Na<sub>2</sub>CO<sub>3</sub> and Mixed**  
3 **Na<sub>2</sub>CO<sub>3</sub>/Li<sub>2</sub>CO<sub>3</sub> Particles: Influence of Li<sub>2</sub>CO<sub>3</sub> on Phase Transitions**  
4 **of Na<sub>2</sub>CO<sub>3</sub> and Formation of LiNaCO<sub>3</sub>**

5 Shuaishuai Ma, Miao Yang, Shufeng Pang\*, Yunhong Zhang\*

6 *The Institute of Chemical Physics, School of Chemistry and Chemical Engineering, Beijing*

7 *Institute of Technology. Beijing 100081, People's Republic of China*

8

---

\* Email: [sfpang@bit.edu.cn](mailto:sfpang@bit.edu.cn), [yhz@bit.edu.cn](mailto:yhz@bit.edu.cn) Phone:86-10-68913596 Fax:86-10-68913596

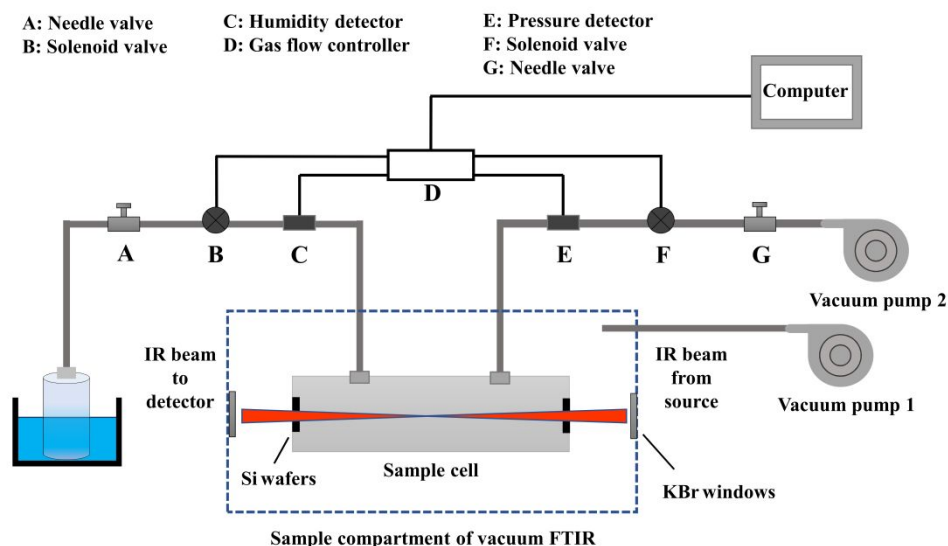

**Fig. S1.** Schematic diagram of a vacuum FTIR spectrometer coupled with a pulsed RH controlling system.

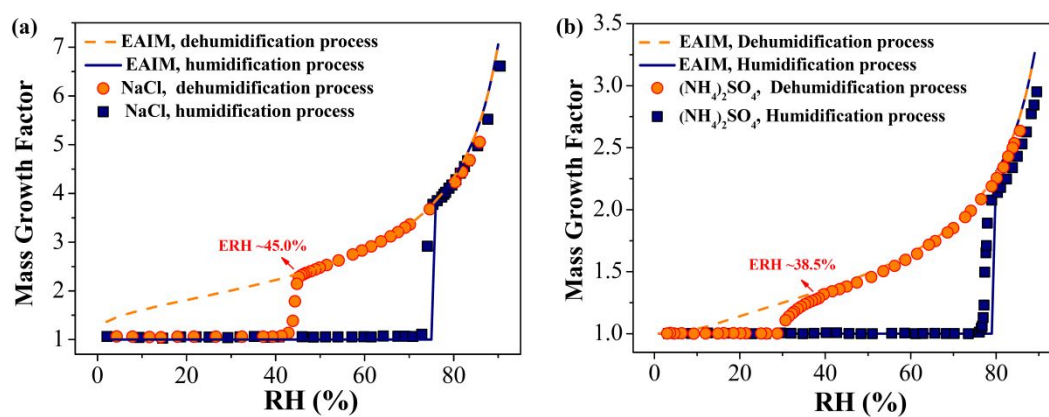

**Fig. S2.** Hygroscopic cycles of NaCl and (NH<sub>4</sub>)<sub>2</sub>SO<sub>4</sub> particles deposited on Si substrates.

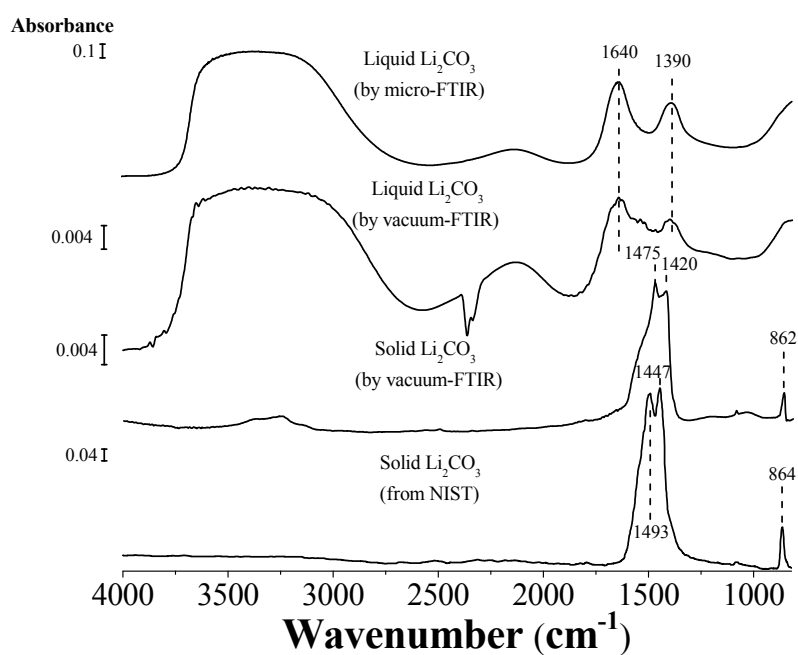

**Fig. S3.** IR spectra of solid and liquid  $\text{Li}_2\text{CO}_3$  measured by vacuum FTIR, microscopic FTIR, and obtained from National Institute of Standards and Technology (NIST) Chemistry WebBook.
